# Supplementary material for: Glucosamine alleviates zearalenone-induced damage to porcine trophectoderm cells by activating the PI3K/AKT signaling pathway
Source: Royal Society of Chemistry journal article supplement (doi:10.1039/d2fo00928e), 2022-01-01

**raw data files**

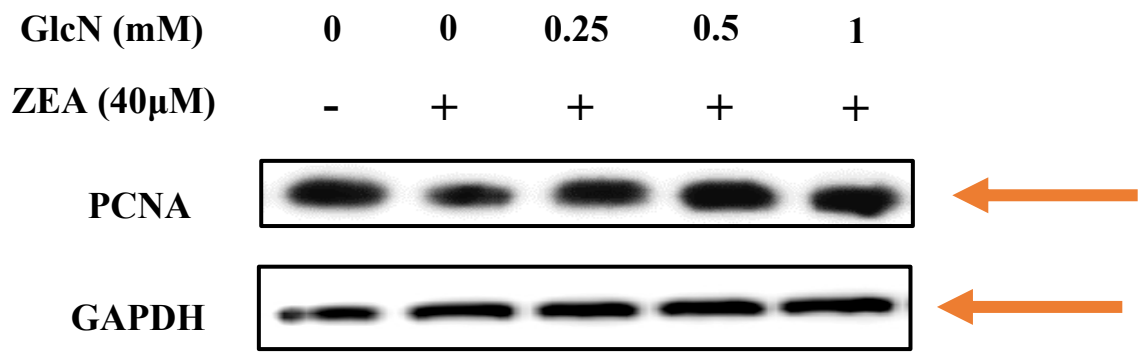

**GlcN (mM)**

**ZEA (40 $\mu$ M)**

**0**

**0**

**0.25**

**0.5**

**1**

**-**

**+**

**+**

**+**

**+**

**EDU**

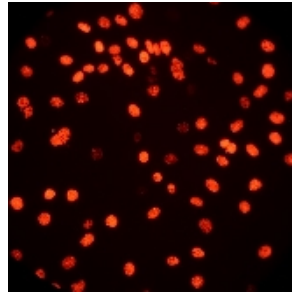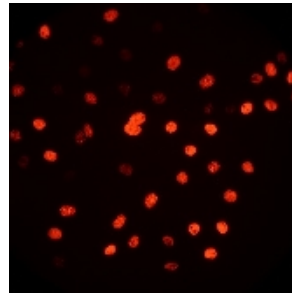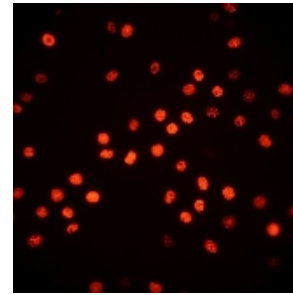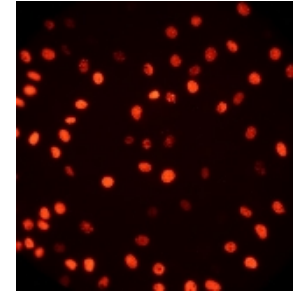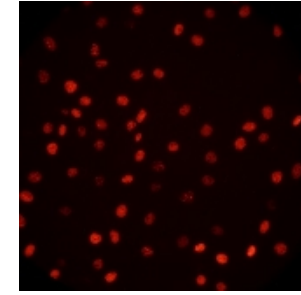

**Hoechst  
33342**

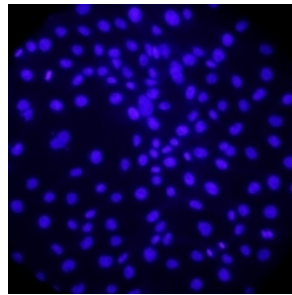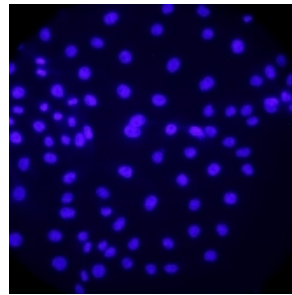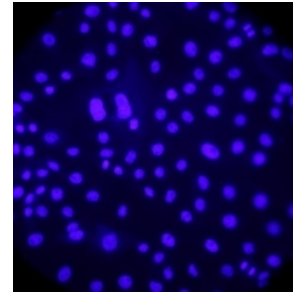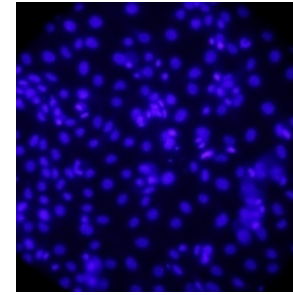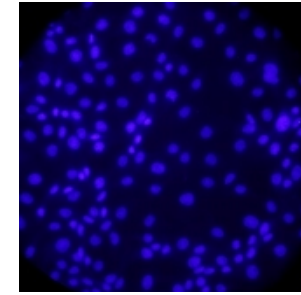

**Merge**

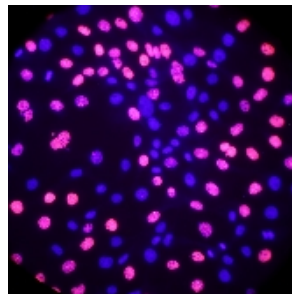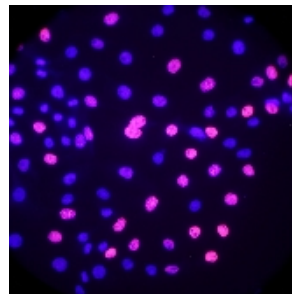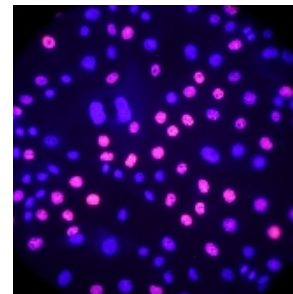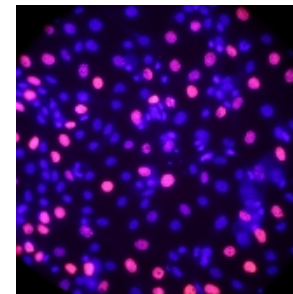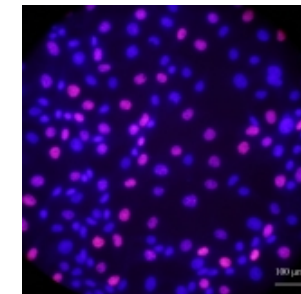

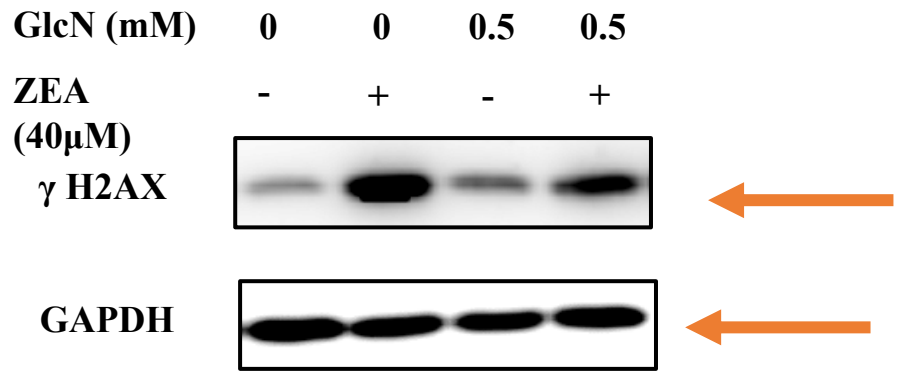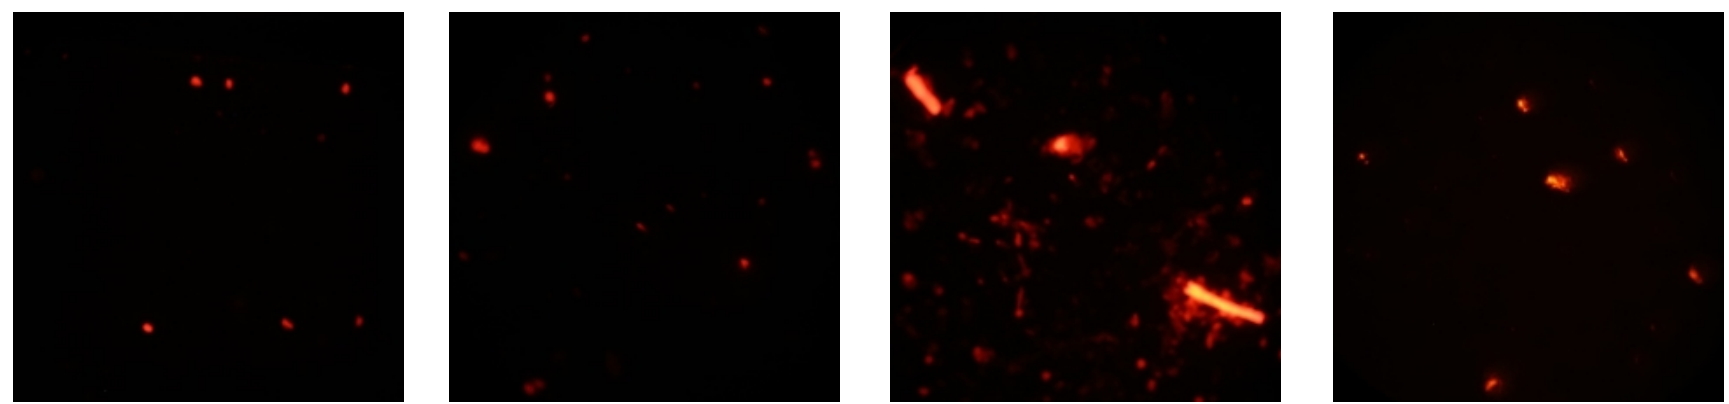

|                   |          |          |            |            |
|-------------------|----------|----------|------------|------------|
| <b>GlcN (mM)</b>  | <b>0</b> | <b>0</b> | <b>0.5</b> | <b>0.5</b> |
| <b>ZEA (40μM)</b> | <b>-</b> | <b>+</b> | <b>-</b>   | <b>+</b>   |

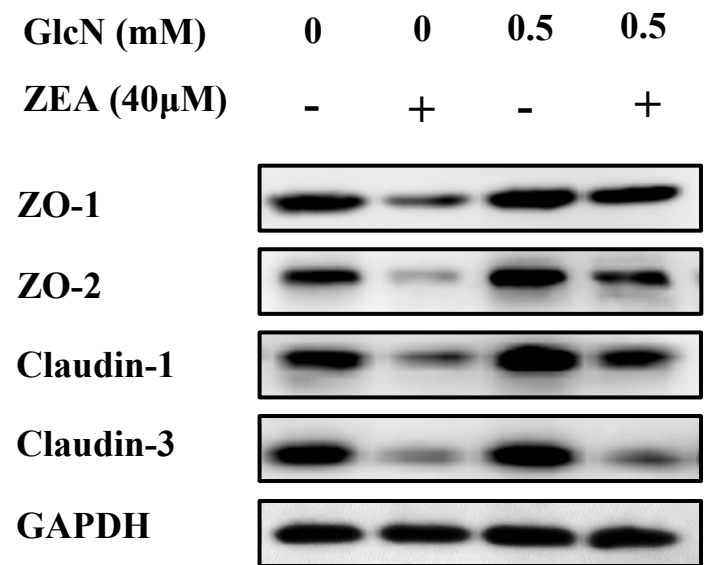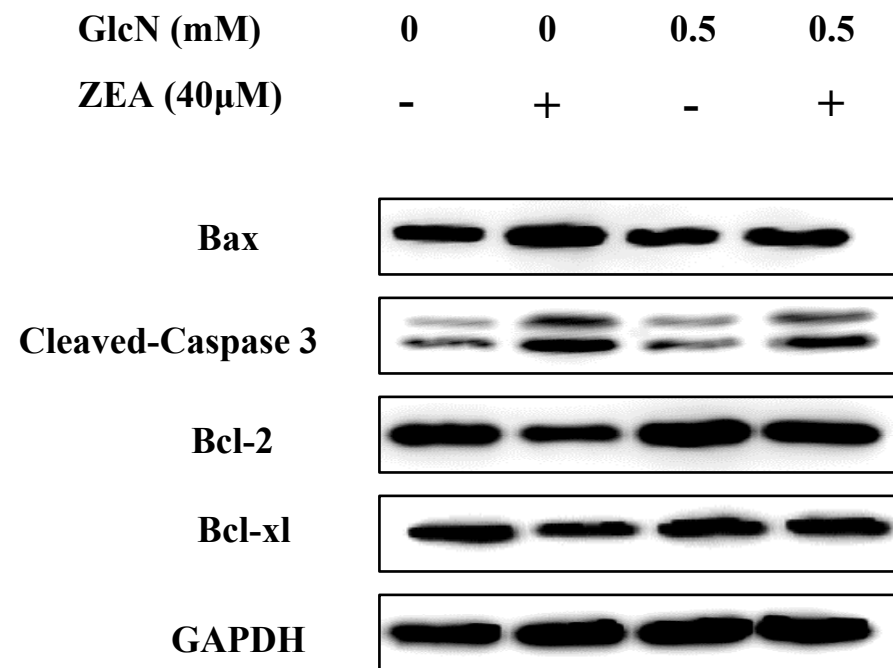

**GlcN (mM)**

**0**

**0**

**0.5**

**0.5**

**ZEA (40 $\mu$ M)**

**-**

**+**

**-**

**+**

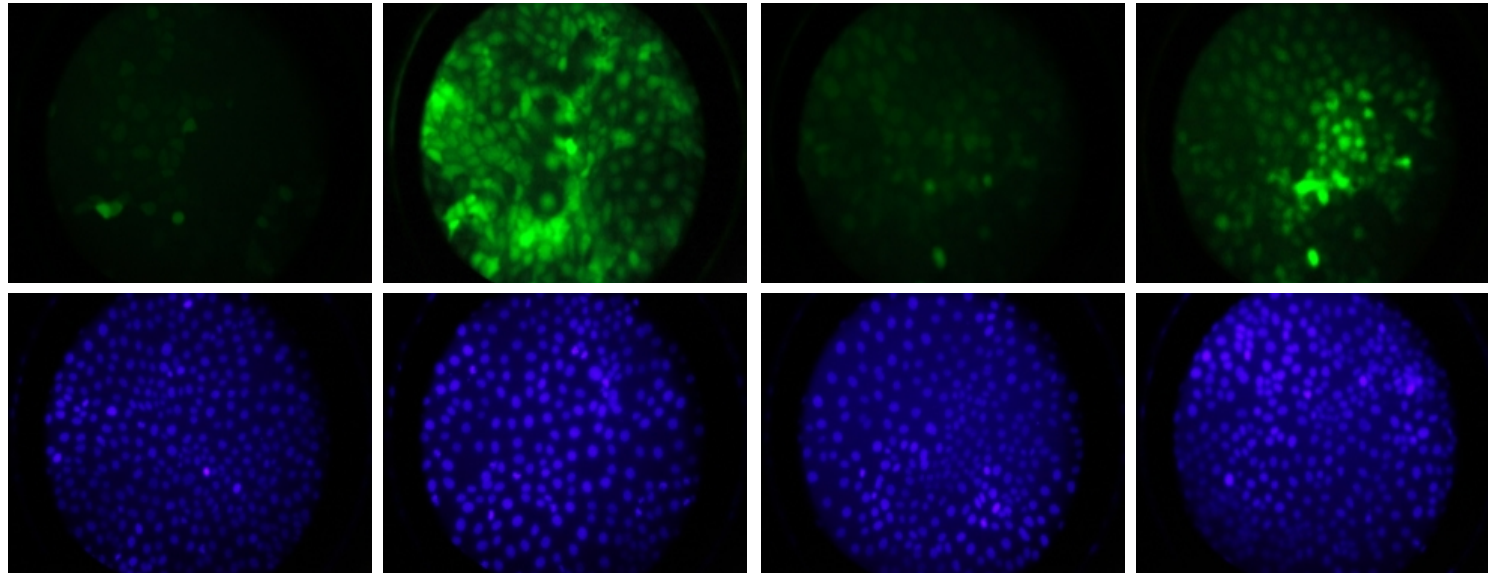

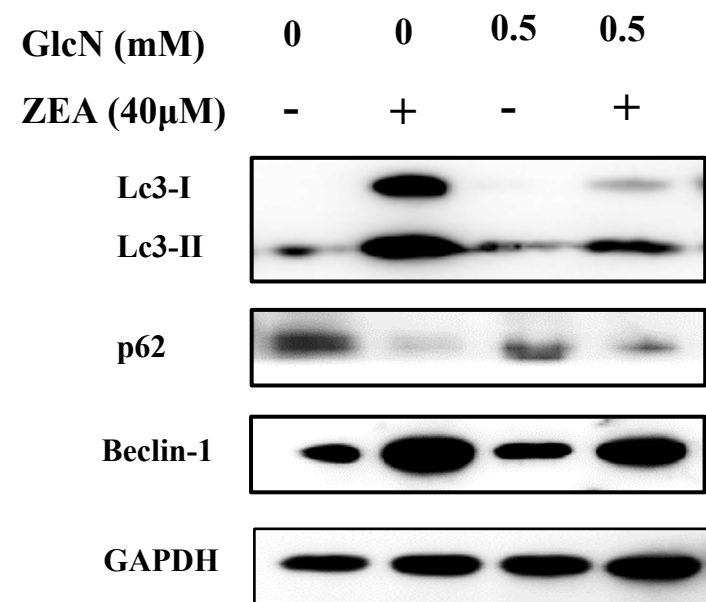

**GlcN (mM)**

**0**

**0**

**0.5**

**0.5**

**ZEA (40 $\mu$ M)**

**-**

**+**

**-**

**+**

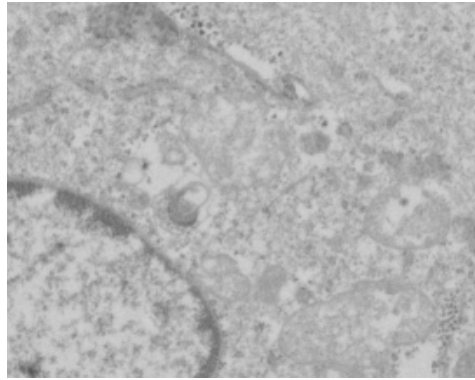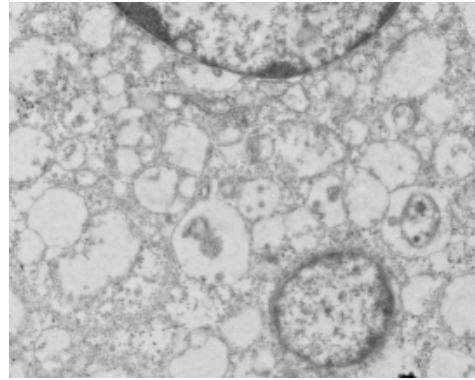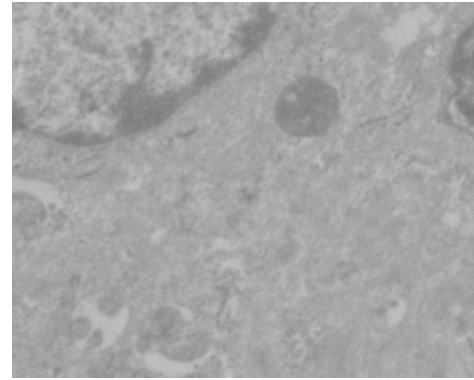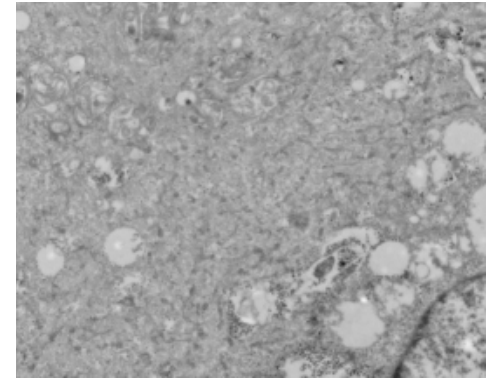



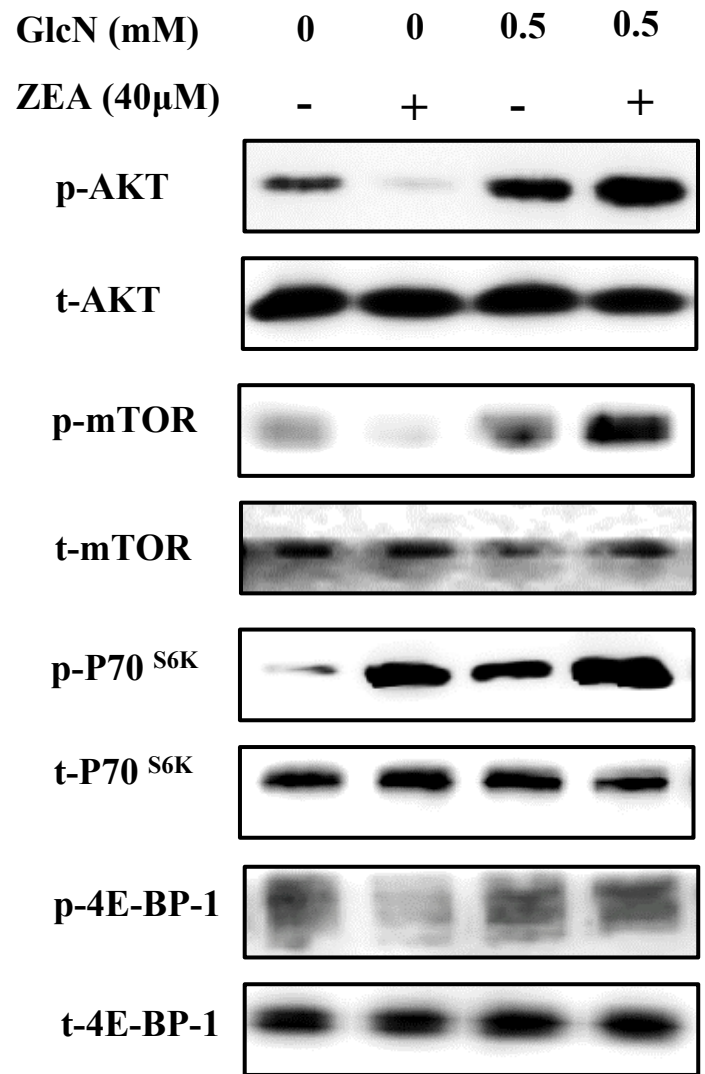

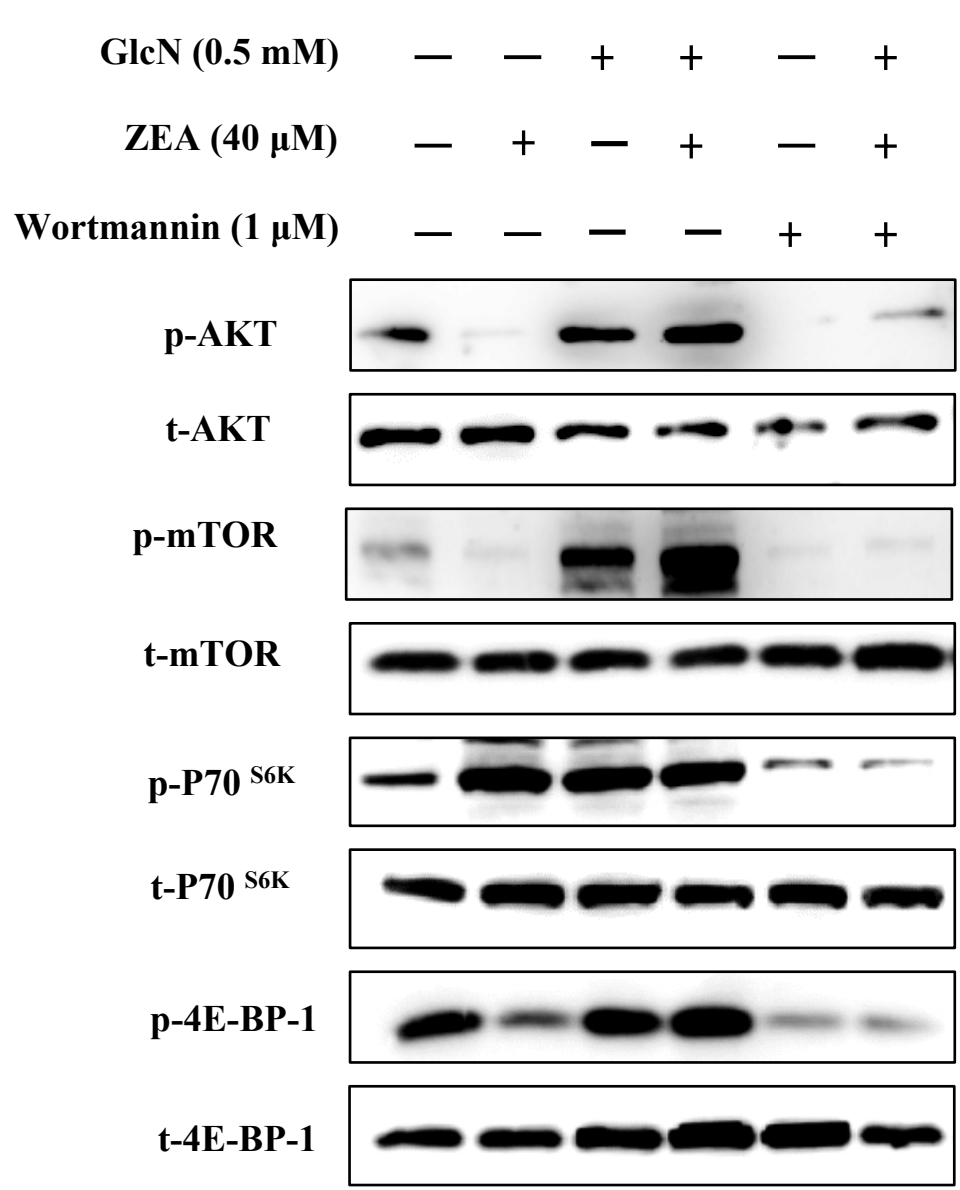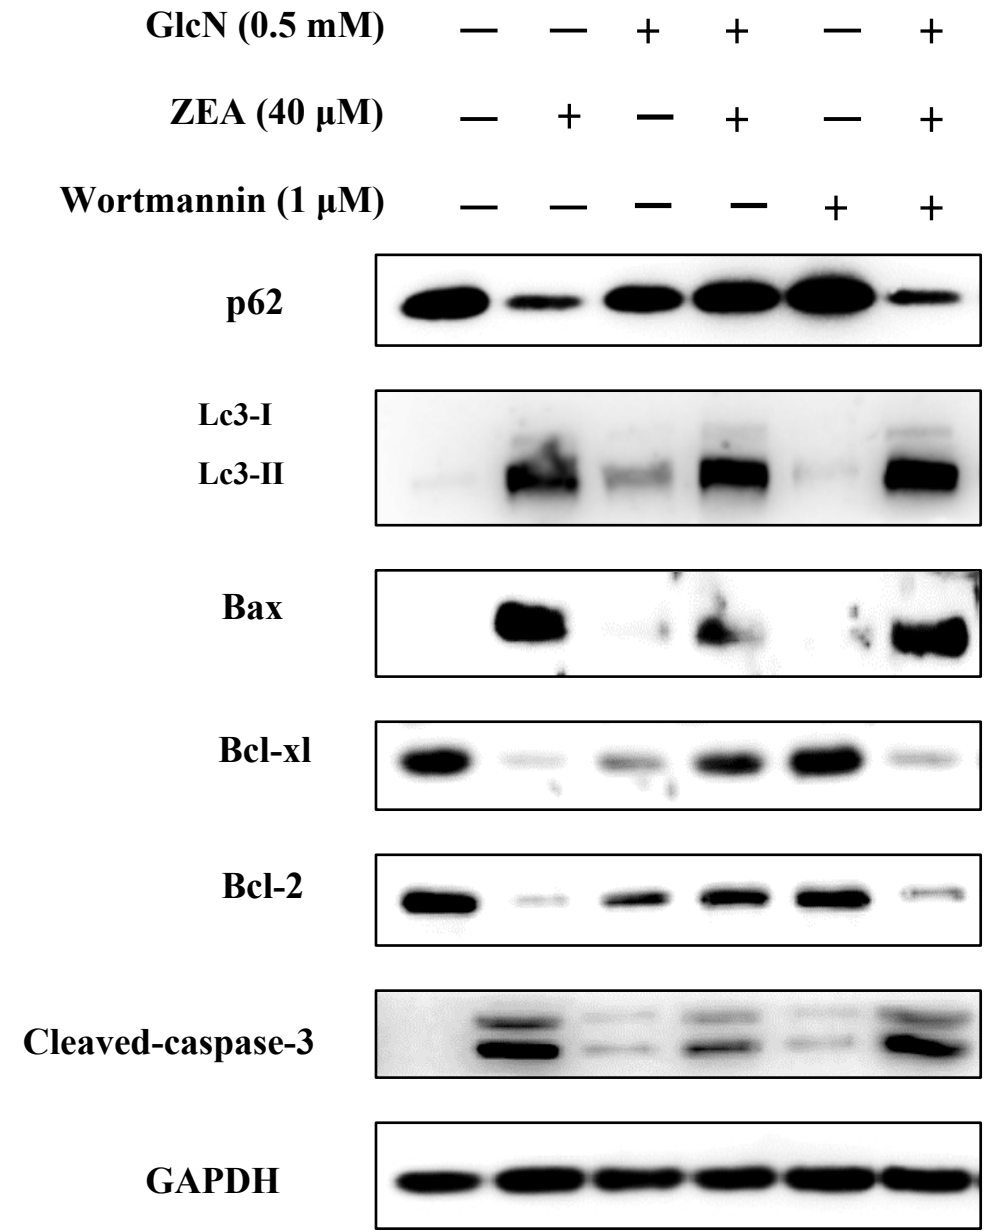

Supplement: d2fo00928e1.pdf [file d2fo00928e1.pdf]
