# Supplementary material for: Glucosamine alleviates zearalenone-induced damage to porcine trophectoderm cells by activating the PI3K/AKT signaling pathway
Source: Royal Society of Chemistry journal article supplement (doi:10.1039/d2fo00928e), 2022-01-01
Supplement: d2fo00928e2.pdf [file d2fo00928e2.pdf]

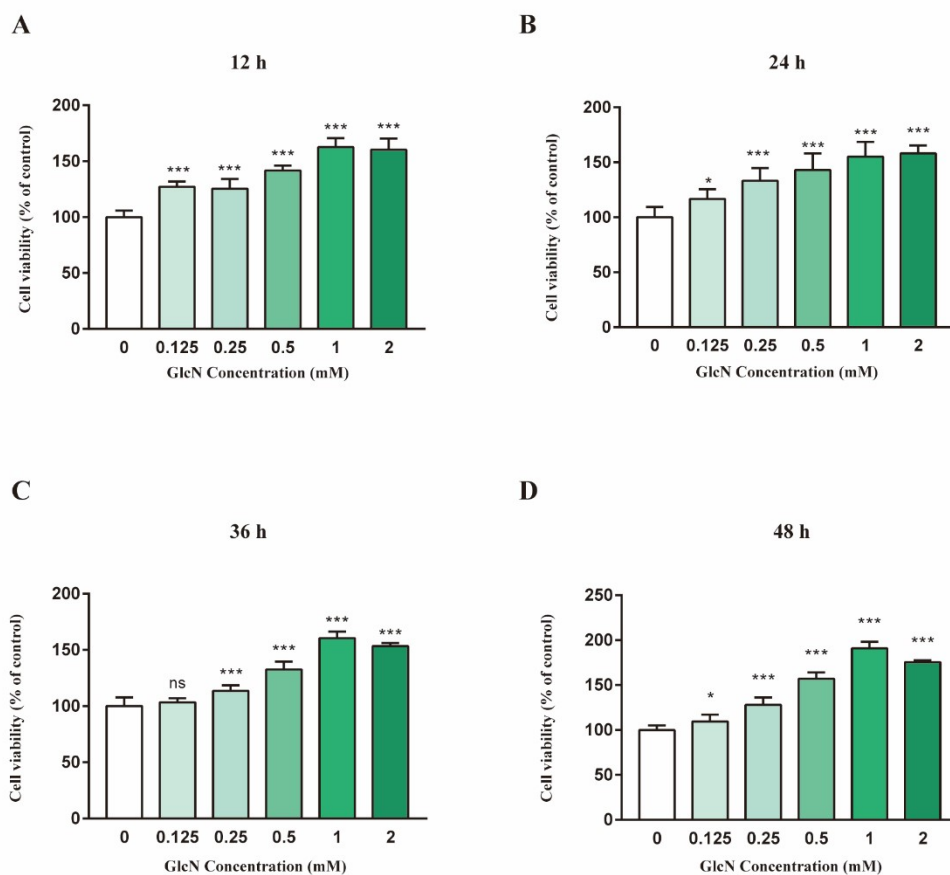

**Fig.S1 Effects of GlcN on cell viability under different concentrations and treatment time in pTr cells.** Data are expressed as the percentage of control group. Values are means  $\pm$  SEM,  $n = 6$ . Different numbers of asterisks represent significant differences (\*\*\*)  $P < .001$ , \*\*  $P < .01$ , and \*  $P < .05$ ).

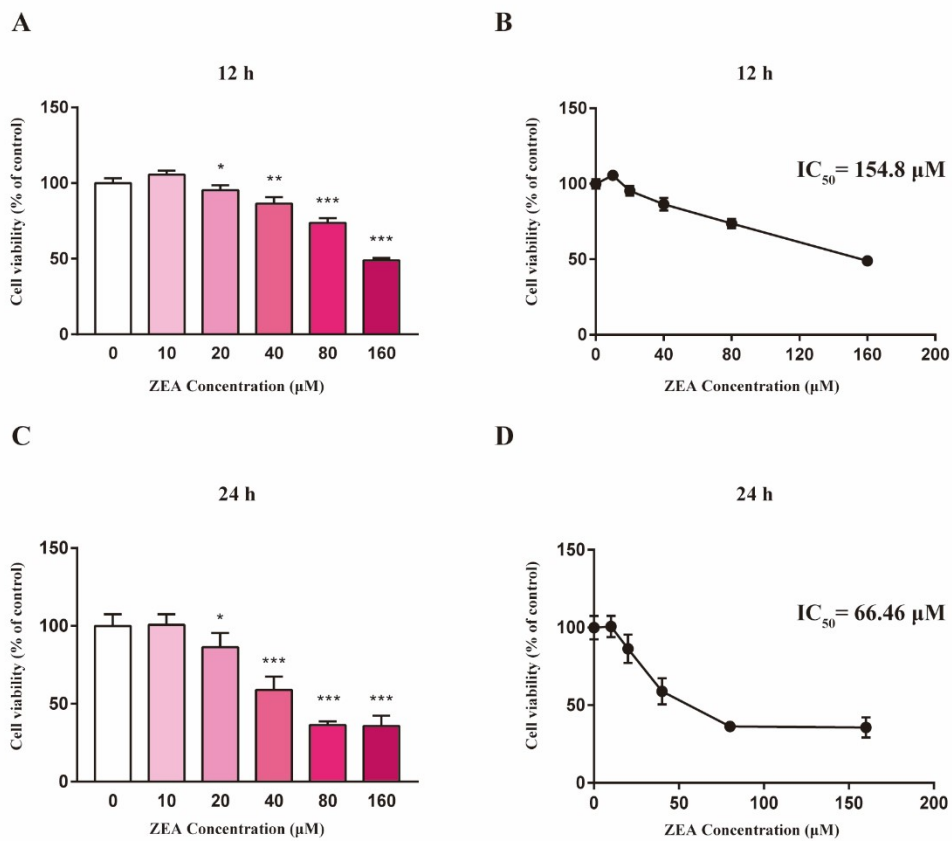

**Fig.S2 Effect of ZEA on cell viability and determination of the half maximal inhibitory concentration in pTr cells for 12 or 24 h.** Data are expressed as the percentage of control group. Values are means  $\pm$  SEM,  $n = 6$ . Different numbers of asterisks represent significant differences (\*\*\*  $P < .001$ , \*\*  $P < .01$ , and \*  $P < .05$ ).
